# Supplementary material for: Environmental Factors Related to Multiple Sclerosis in Indian Population
Source: PubMed Central journal article supplement (PMC4406747; doi:10.1371/journal.pone.0124064), 2015-04-22
Supplement: pone.0124064.s001.pdf [file pone.0124064.s001.pdf]

**C. Concurrent illness -**

A. Diabetes    No    Yes                      Age of diagnosis                      (yrs)

B. Auto immune disease- (Tick against) Bronchial asthma, Allergy, Thyroiditis,  
Collagen vascular Disease, other (specify)

**D. Past History of infections** (Tick against)- Don't remember

Remember - Measles, Mumps, Chicken Pox, TB, other

**E. Vaccinations** –Don't remember

Remember - Measles, Mumps, Rubella, DPT, Polio, TB, Hepatitis

**F. Family history-**

a) MS-

b) Other Neurological disorder (Name of disease and relative affected)

| Mother                   | Father                   | Sibling                                                                      | Other Relative                                                                                                                                  |                                                                                                                                                 |
|--------------------------|--------------------------|------------------------------------------------------------------------------|-------------------------------------------------------------------------------------------------------------------------------------------------|-------------------------------------------------------------------------------------------------------------------------------------------------|
|                          |                          |                                                                              | Maternal Relation                                                                                                                               | Paternal Relation                                                                                                                               |
| <input type="checkbox"/> | <input type="checkbox"/> | <input type="checkbox"/> Sib#, -----<br><input type="checkbox"/> Sib#, ----- | <input type="checkbox"/> Uncle<br><input type="checkbox"/> Aunt<br><input type="checkbox"/> Grandmother<br><input type="checkbox"/> Grandfather | <input type="checkbox"/> Uncle<br><input type="checkbox"/> Aunt<br><input type="checkbox"/> Grandmother<br><input type="checkbox"/> Grandfather |

## G. Sun Exposure Information

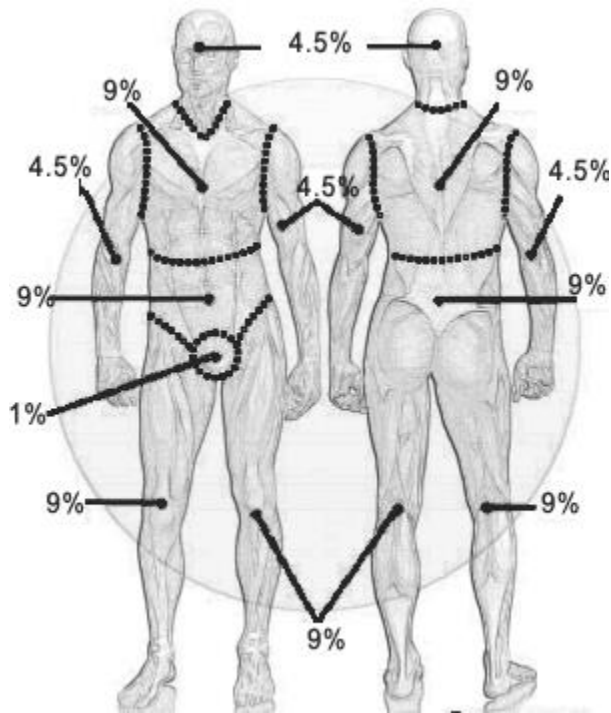

| Dress code |                 | Morning<br>(8.00 am to<br>1.00 pm) | Afternoon<br>(1.00 pm to 5.00<br>pm) | Evening<br>(5.00 pm<br>to 6.00<br>pm) | Total Hours of<br>Sun Exposure | Percentage of<br>Sun Exposure |
|------------|-----------------|------------------------------------|--------------------------------------|---------------------------------------|--------------------------------|-------------------------------|
|            | Ages 6 to 12    |                                    |                                      |                                       |                                |                               |
|            | Ages 13 to 15   |                                    |                                      |                                       |                                |                               |
|            | Ages 16 to 18   |                                    |                                      |                                       |                                |                               |
|            | Ages 19 to 21   |                                    |                                      |                                       |                                |                               |
|            | 22 years and up |                                    |                                      |                                       |                                |                               |
|            |                 |                                    |                                      |                                       | Mean=                          | Mean=                         |

## Healthy control

**Name**

**Age/ Sex**

**Address**

**Contact Number**

Weight (kg)

Height (mts)

BMI

Relation to patient - Spouse , Friend, Medical personnel, Patient volunteer, other

Primary diagnosis (for patient volunteer)

**Religion**

**Caste**

**Language**

**Educational Status:** Illiterate, Primary, High School, PUC, Graduate

**Area of living** - Rural Urban Slum

**Diet:** Veg Non veg

**Monthly Income :** Low (<Rs4000/m) , Lower Middle ( 4000-15,000/m),

Upper Middle ( Rs 15,000- 55000/m) , high (> 55000/m)

**History of** 1. Diabetes 2. Asthma 3. Allergies 4. Thyroiditis 5. Other Automimmune disease (specify)

**Past Infections :** Don't remember

Remember - Measles, Mumps, Chicken Pox, TB, other

**Past vaccinations** – Don't remember

Remember - Measles, Mumps, Rubella, DPT, Polio, TB, Hepatitis

**Smoking** – Has the control ever smoked cigarettes?

No / Yes If yes, age of smoking onset: (yrs)

Number of cigarettes per week:

If the control no longer smokes, age at stopping (yrs)

Has anyone in the controls household smoked while living with him/her?

No / Yes If yes, how many people smoke?

How old was the control when exposed to second-hand smoke  
in the home? ( yrs )

How many cigarettes per day are/ were consumed (on average) in the  
controls household?

If no-one in the home smokes now, age of control when smoking stopped:

| <b>Other habits</b> | <b>Yes</b> | <b>No</b> | <b>duration</b> |
|---------------------|------------|-----------|-----------------|
| Betel nut           | -          |           |                 |
| Tobacco chewing     | -          |           |                 |
| Snuff               | -          |           |                 |

## Sun Exposure Information

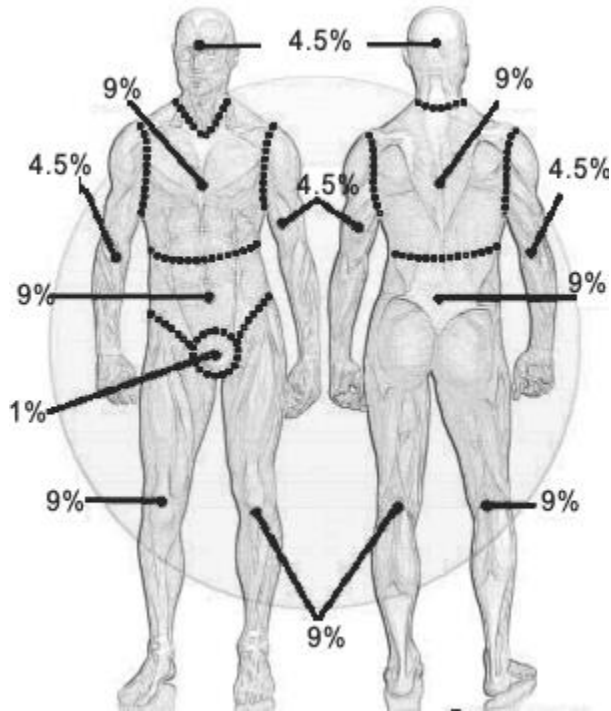

| Dress code |                 | Morning<br>(8.00 am to<br>1.00 pm) | Afternoon<br>(1.00 pm to 5.00<br>pm) | Evening<br>(5.00 pm<br>to 6.00<br>pm) | Total Hours of<br>Sun Exposure | Percentage of<br>Sun Exposure |
|------------|-----------------|------------------------------------|--------------------------------------|---------------------------------------|--------------------------------|-------------------------------|
|            | Ages 6 to 12    |                                    |                                      |                                       |                                |                               |
|            | Ages 13 to 15   |                                    |                                      |                                       |                                |                               |
|            | Ages 16 to 18   |                                    |                                      |                                       |                                |                               |
|            | Ages 19 to 21   |                                    |                                      |                                       |                                |                               |
|            | 22 years and up |                                    |                                      |                                       |                                |                               |
|            |                 |                                    |                                      |                                       | Mean=                          | Mean=                         |
